# Supplementary material for: The variations of IL-23R are associated with susceptibility and severe clinical forms of pulmonary tuberculosis in Chinese Uygurs
Source: PubMed Central journal article supplement (PMC4665827; doi:10.1186/s12879-015-1284-2), 2015-12-01
Supplement: 12879_2015_1284_MOESM2_ESM.pdf [file 12879_2015_1284_MOESM2_ESM.pdf]

**Table S1.** Primer sets used for the initial exons sequencing of *IL23R*

| Exon       | Exon Length (bp) | PCR primers (sense/antisense)  | PCR Products Length (bp) | Annealing Temperature |
|------------|------------------|--------------------------------|--------------------------|-----------------------|
| Exon1      | 56               | ATAGTGACACGAGAGCCAGTCATTT      | 577                      | 65°C                  |
|            |                  | CAATGCATGGCTCATCATATCGCAT      |                          |                       |
| Exon2      | 99               | AACTCAGAGGAGGAGGTTTCTGATG      | 648                      | 63°C                  |
|            |                  | AGGGCTGTCTAGAAGGGAAATTTGA      |                          |                       |
| Exon3      | 297              | AGATACATCTAGTCCTAAAAGTGT       | 838                      | 55°C                  |
|            |                  | ACAAGAAGATTAAGAGCAACA          |                          |                       |
| Exon4      | 124              | GGTGTGCCATTTGCTGAGACTGT        | 634                      | 55°C                  |
|            |                  | GTAGGAAATAAGGATAAATCAGGGT<br>A |                          |                       |
| Exon5      | 161              | AGGCACATGCCACCAATTATTGT        | 539                      | 59°C                  |
|            |                  | GCAGCACTACTCATCTCTAAGTTGTC     |                          |                       |
| Exon6      | 146              | AGGATTGTAAGGGAGTGAAAGGTG       | 506                      | 63°C                  |
|            |                  | AAGTCCACTGTAGCCACTGATGGTT      |                          |                       |
| Exon7      | 157              | CATCTCAAAAAAGCAGTGTGTGTT       | 632                      | 63°C                  |
|            |                  | GCTCACGCAATCCTACTACCTCA        |                          |                       |
| Exon8      | 90               | GCCTCATGAAATTAGTGGACACACC      | 563                      | 65°C                  |
|            |                  | GCAAAATCCACCTAAGCCACTTCTT      |                          |                       |
| Exon9      | 103              | GCACTTCTAAAAACCCACTGACATC      | 633                      | 65°C                  |
|            |                  | AGTGATTCTGGGCTGAGGACTTAG       |                          |                       |
| Exon10     | 91               | TGGCATGGTCACAGCTCACTACA        | 624                      | 63°C                  |
|            |                  | CCCCCAACTCTATTGTCTCATCTCT      |                          |                       |
| Exon11-1 * | 1502             | TGGAGGGAGAAAGGAAAGTTGAAAG      | 641                      | 63°C                  |
|            |                  | AAGCAGGGTCTGTTCTGGAATAGTT      |                          |                       |
| Exon11-2 * | 1502             | TCCCAGGTTACAAAAGCATCCTAAT      | 676                      | 63°C                  |
|            |                  | TTCCACCTTCGGGACCTTAATTCTC      |                          |                       |
| Exon11-3 * | 1502             | GTGACATTTCTGTGCTCCTACCAT       | 745                      | 63°C                  |
|            |                  | CACTTATTTGTCATTGGGGCTAT        |                          |                       |

\* Exon11 has 1502 bps, so the fragment containing exon11 is too long to be sequenced directly by ABI 3730 Genetic Analyzer. Therefore, this fragment was sliced into 3 shorter fragments. The middle short one repeated partial sequences of the other short fragments at both sides. These 3 short fragments were then amplified using a pair of primers respectively.
